# Supplementary material for: Nanopatterned conductive polymer films as a Pt, TCO-free counter electrode for low-cost dye-sensitized solar cells
Source: Royal Society of Chemistry journal article supplement (doi:10.1039/c3nr01294h), 2013-01-01
Supplement: c3nr01294h.pdf [file c3nr01294h.pdf]

# Supporting Information

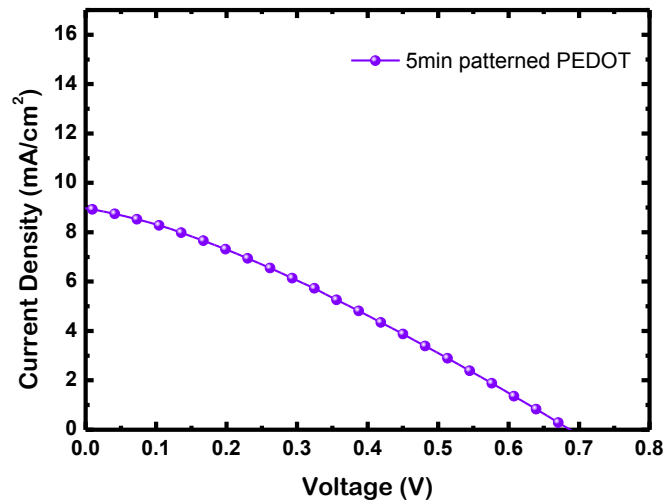

Figure S1. I-V curve of DSSC with CE with 5 min polymerized PEDOT film on the PS pattern

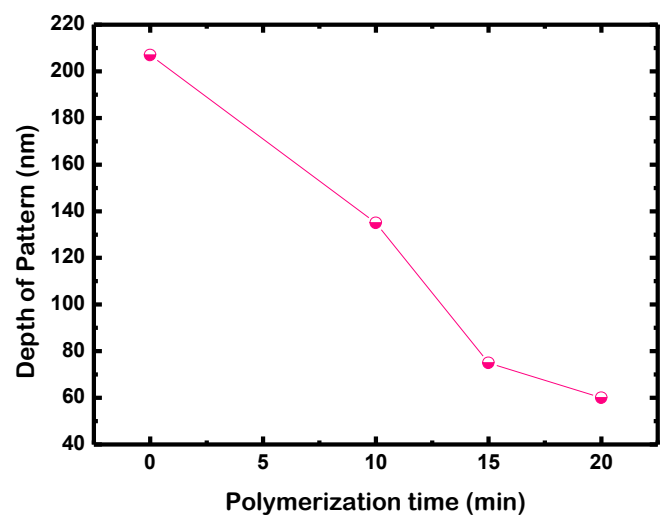

Figure S2. Depth of PEDOT nanopatterns with different polymerization time.

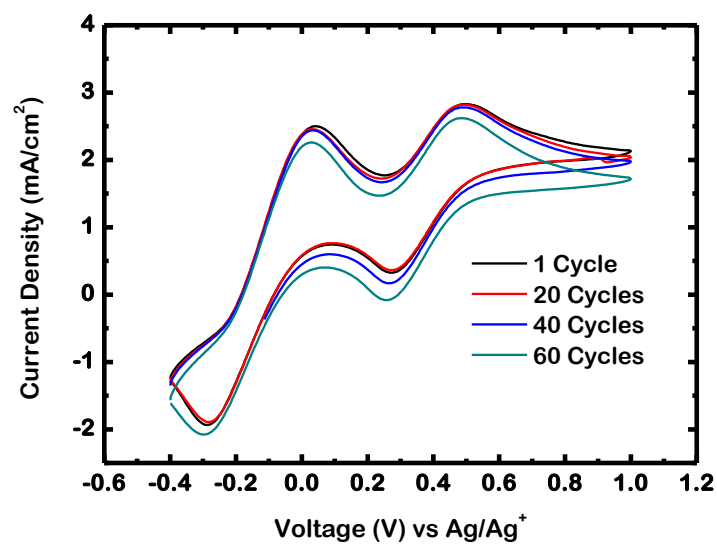

Figure S3. Cyclic voltammograms of 10 min patterned PEDOT counter electrodes as a function of cycle number (scan rate of 50 mVs<sup>-1</sup>).

$\Omega\text{cm}^2$

|                  | $R_s$ | $R_{ct} @ \text{CE}$ | $R_{ct} @ \text{WE}$ | $R_{diff} @ \text{EL}$ |
|------------------|-------|----------------------|----------------------|------------------------|
| Pt-FTO           | 1.7   | 1.0                  | 2.3                  | 1.3                    |
| non-patterned    | 4.0   | 4.4                  | 3.8                  | 2.2                    |
| 10 min patterned | 2.8   | 4.3                  | 3.8                  | 2.0                    |
| 15 min patterned | 3.4   | 4.4                  | 3.8                  | 1.9                    |
| 20 min patterned | 4.4   | 4.8                  | 3.7                  | 1.9                    |

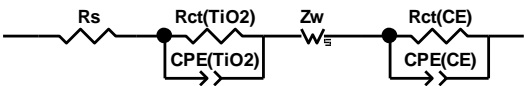

Table S1.  $R_{ct1}$ ,  $R_{ct2}$  and  $R_{diff}$  values calculated from the EIS data

## Measurements

The electrical conductivity of (poly (3, 4-ethylenedioxythiophene)) (PEDOT) was measured using a standard four-point-probe system with a current source and nanovotmeter. Film thickness was measured using a Alpha-step. The electrical conductivity was calculated by below equation.

$$\rho(\text{ohm} \times \text{cm}) = 2\pi s F \times t(\text{cm}) \times \left(\frac{V}{I}\right) (\text{ohm}) = 4.532 \times t \times \left(\frac{V}{I}\right)$$

$$\rho = 4.532 \times 100 \times 10^{-7}(\text{cm}) \times \left(\frac{2.5\text{mV}}{0.1\text{mA}}\right) = 0.001133(\text{ohm} \times \text{cm})$$

$$S(1/\text{ohm} \times \text{cm}) = 1/\rho = 882.61(S/\text{cm})$$

Where  $\rho$  is resistivity,  $s$  is the gap between the probes,  $F$  is correction factor,  $V$  is the voltage between 2 and 3 probes,  $I$  is the applied current between 1 and 4 probes,  $t$  is the thickness of PEDOT film, and  $S$  is electrical conductivity.
